# Supplementary material
Source: publisher figshare collection journal article supplement (https://acs.figshare.com/ndownloader/files/3939373)
Supplement: Supplementary file 1 [file 3939373]

## Supporting information

### Cu(II) as a general cocatalyst for enhanced visible-light photocatalytic activity of photosensitive Ag-based compounds

*Ping Wang,<sup>†</sup> Yang Xia,<sup>†</sup> Panpan Wu,<sup>†</sup> Xuefei Wang,<sup>†</sup> Huogen Yu<sup>†,‡,\*</sup>, Jiaguo Yi<sup>§</sup>*

<sup>†</sup> Department of Chemistry, School of Science, Wuhan University of Technology, Wuhan 430070,

People's Republic of China

<sup>‡</sup> State Key Laboratory of Silicate Materials for Architectures, Wuhan University of Technology,

Wuhan 430070, People's Republic of China

<sup>§</sup> State Key Laboratory of Advanced Technology for Material Synthesis and Processing, Wuhan

University of Technology, Wuhan 430070, People's Republic of China

Tel: 0086-27-87871029, Fax: 0086-27-87879468

E-mail: yuhuogen@whut.edu.cn

Figure S1

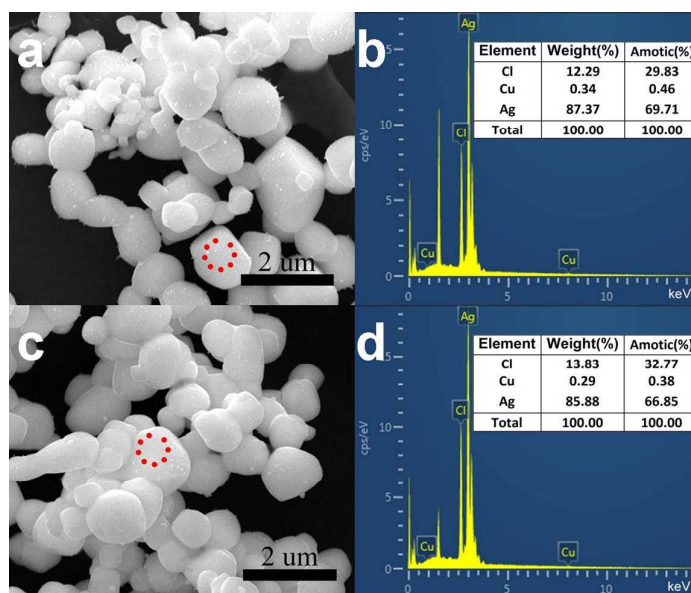

**Figure S1.** (a) FESEM image of as-prepared Cu(II)/AgCl (0.05M) and (b) its corresponding EDX; (c) FESEM image of 5-time repeated Cu(II)/AgCl (0.05M) and (d) its corresponding EDX.
